# Supplementary material for: A microporous bismuth-based MOF for efficient separation of acetylene from carbon dioxide
Source: Royal Society of Chemistry journal article supplement (doi:10.1039/d4dt00246f), 2024-01-01
Supplement: d4dt00246f1.pdf [file d4dt00246f1.pdf]

## Supporting Information

### **A microporous Bismuth-based MOF for efficient separation of acetylene from carbon dioxide**

Bo Xing, Shan-Qing Yang, Qiang Zhang and Tong-Liang Hu\*

School of Materials Science and Engineering, National Institute for Advanced Materials, Nankai University, Tianjin 300350, China. E-mail: tlhu@nankai.edu.cn

## Fitting of Pure Component Isotherms

Dual-site Langmuir-Freundlich model was used to predict binary mixture adsorption from the experimental pure-gas isotherms.

$$q = q_{A, sat} \frac{b_A p^{c_A}}{1 + b_A p^{c_A}} + q_{B, sat} \frac{b_B p^{c_B}}{1 + b_B p^{c_B}}$$

with T-dependent parameters  $b_A$  and  $b_B$ .

$$b_A = b_{A0} \exp\left(\frac{E_A}{RT}\right)$$

$$b_B = b_{B0} \exp\left(\frac{E_B}{RT}\right)$$

Where  $p$  is the pressure of the bulk gas at equilibrium with the adsorbed phase (kPa),  $q$  is the adsorbed amount per mass of adsorbent (mmol g<sup>-1</sup>),  $q_{A, sat}$ ,  $q_{B, sat}$  are the saturation capacities (mmol g<sup>-1</sup>),  $b_A$ ,  $b_B$  are the affinity coefficient.

## Calculation for C<sub>2</sub>H<sub>2</sub>/CO<sub>2</sub> Adsorption Selectivities

The ideal adsorbed solution theory (IAST) was used to estimate the composition of the adsorbed phase from the data of single component isotherms and predict the selectivity of binary mixtures C<sub>2</sub>H<sub>2</sub>/CO<sub>2</sub>. IAST calculations for equimolar C<sub>2</sub>H<sub>2</sub>/CO<sub>2</sub> mixtures adsorption at 278 and 298 K, respectively were performed by

$$S_{ads} = \frac{q_1/q_2}{p_1/p_2}$$

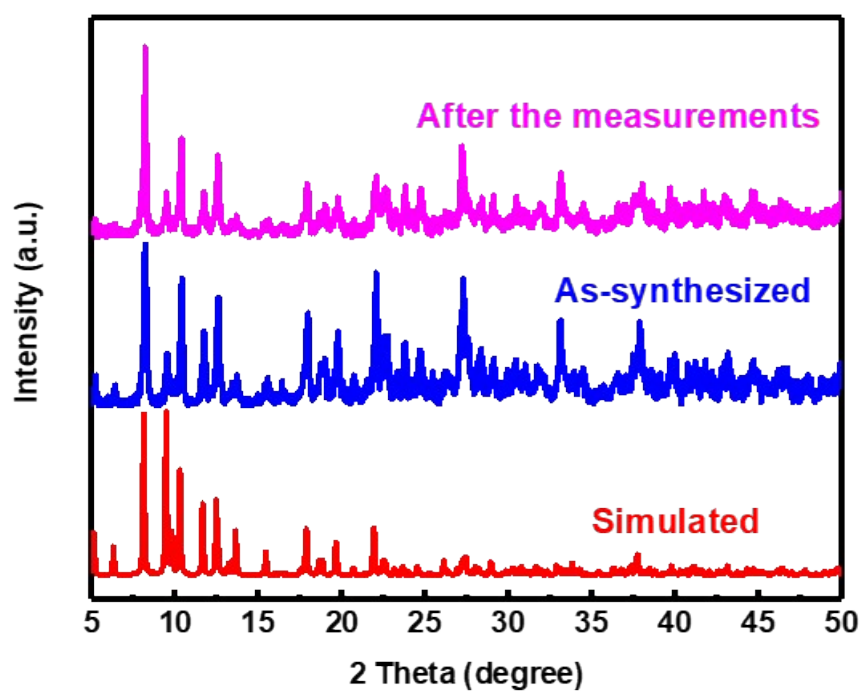

**Figure S1.** The PXR D patterns of Bi-BTC.

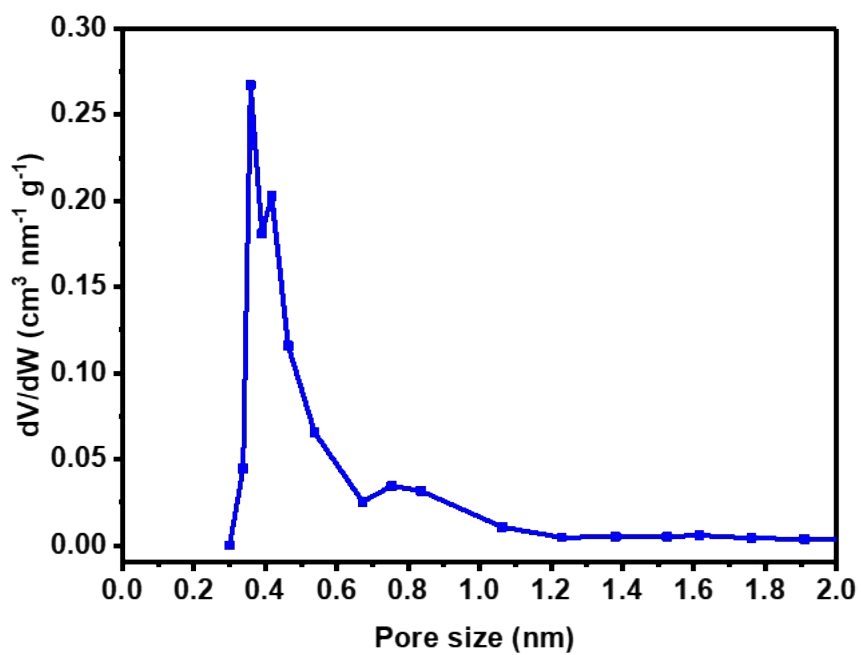

**Figure S2.** Pore size distribution of Bi-BTC.

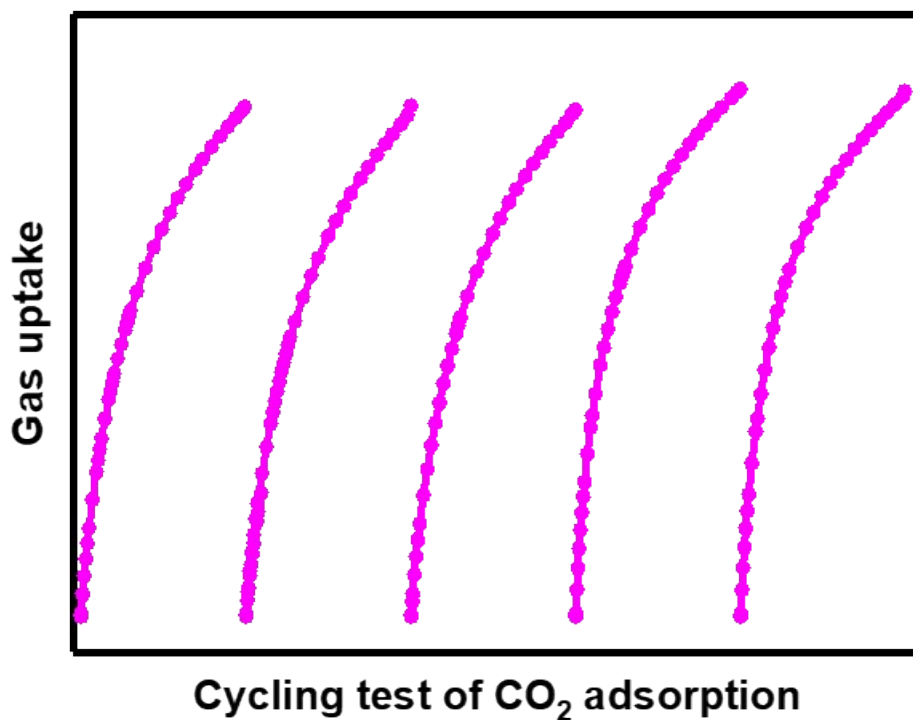

**Figure S3.** Cycling test of CO<sub>2</sub> adsorption measurements for Bi-BTC at 298 K and 1.0 bar.

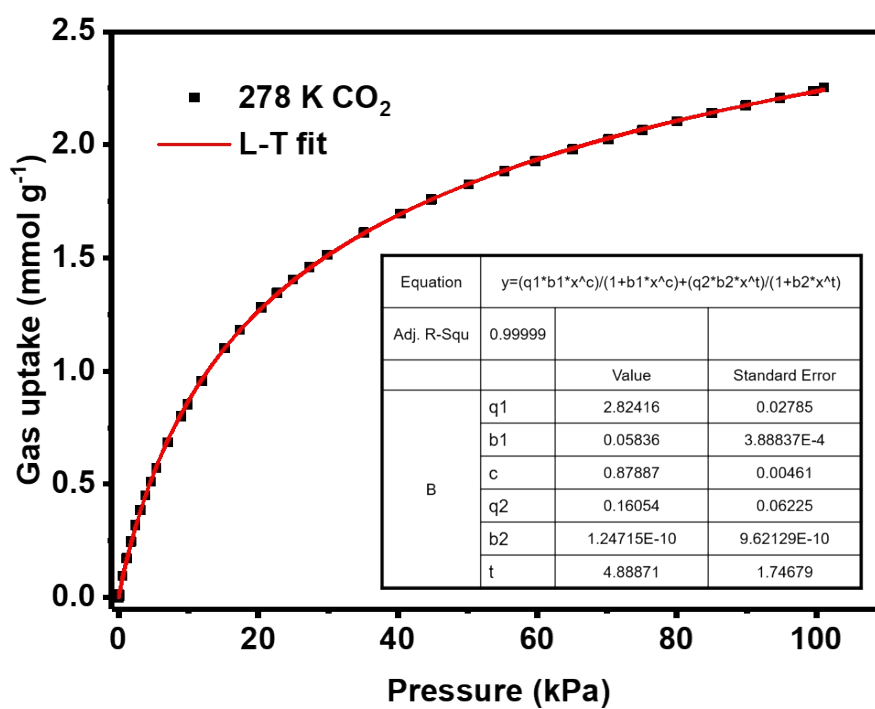

**Figure S4.** Dual-site Langmuir-Freundlich model for CO<sub>2</sub> adsorption isotherm on Bi-BTC at 278 K.

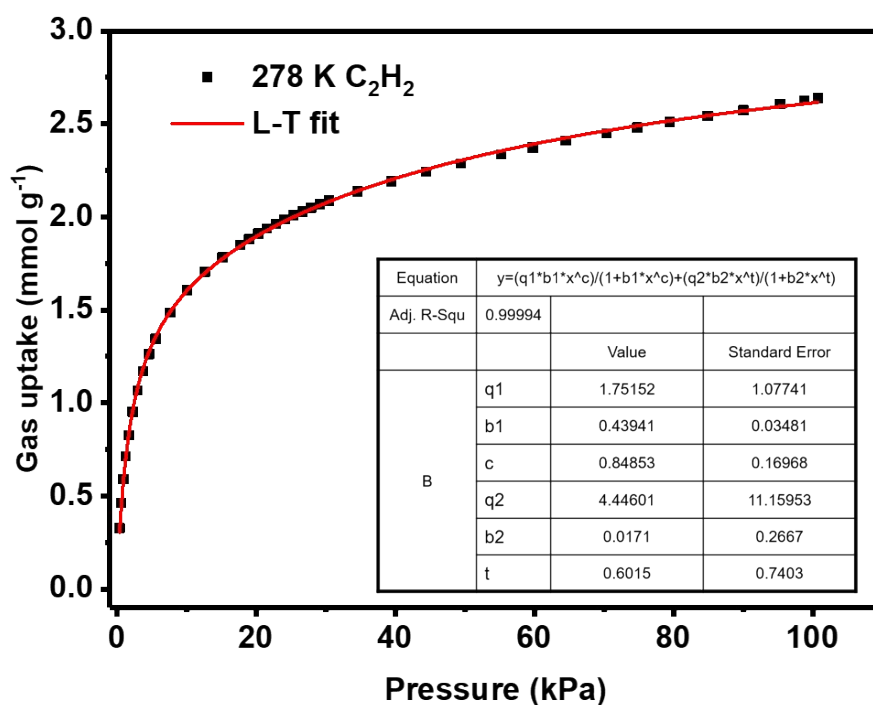

**Figure S5.** Dual-site Langmuir-Freundlich model for C<sub>2</sub>H<sub>2</sub> adsorption isotherm on Bi-BTC at 278 K.

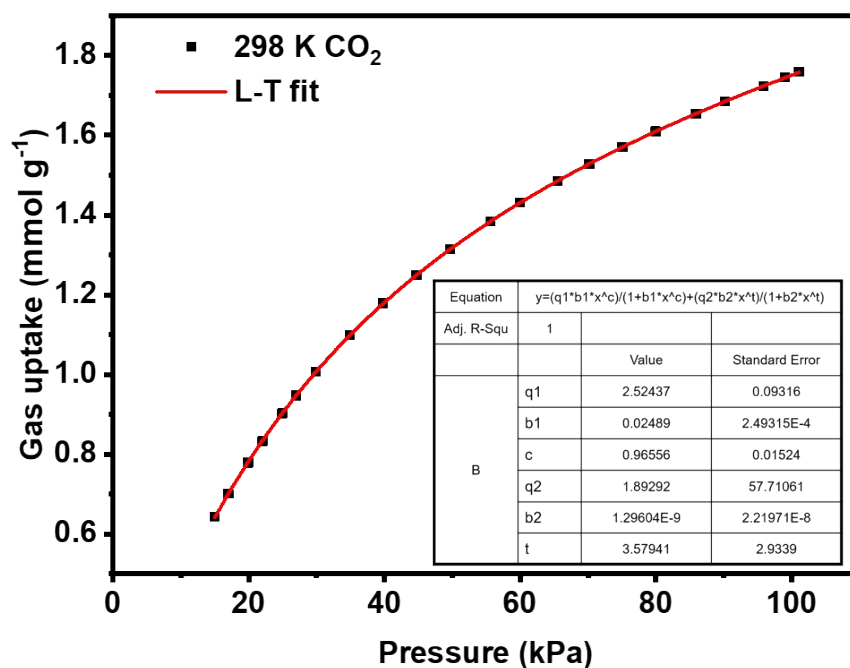

**Figure S6.** Dual-site Langmuir-Freundlich model for CO<sub>2</sub> adsorption isotherm on Bi-BTC at 298 K.

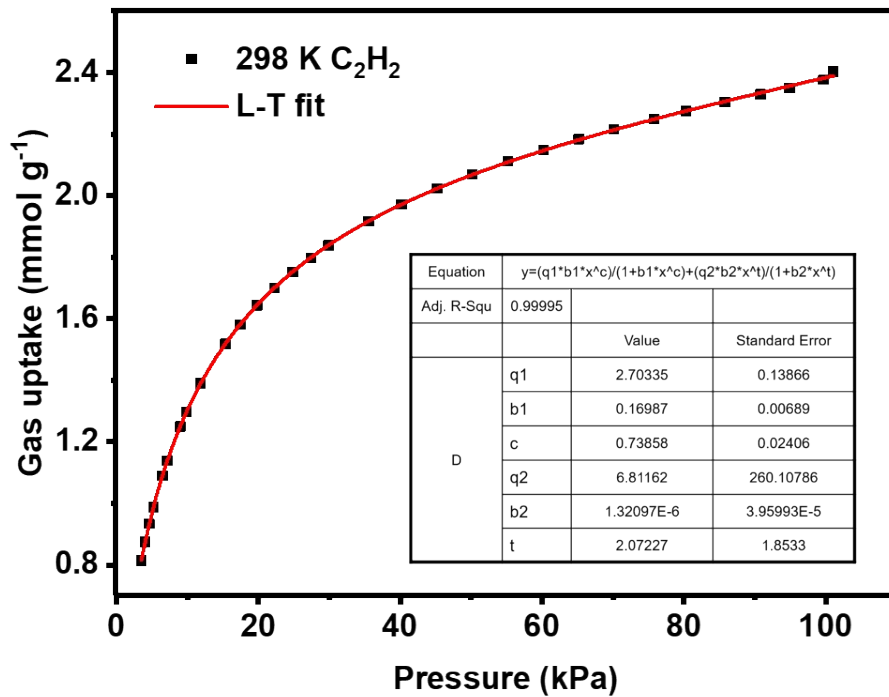

**Figure S7.** Dual-site Langmuir-Freundlich model for C<sub>2</sub>H<sub>2</sub> adsorption isotherm on Bi-BTC at 298 K.

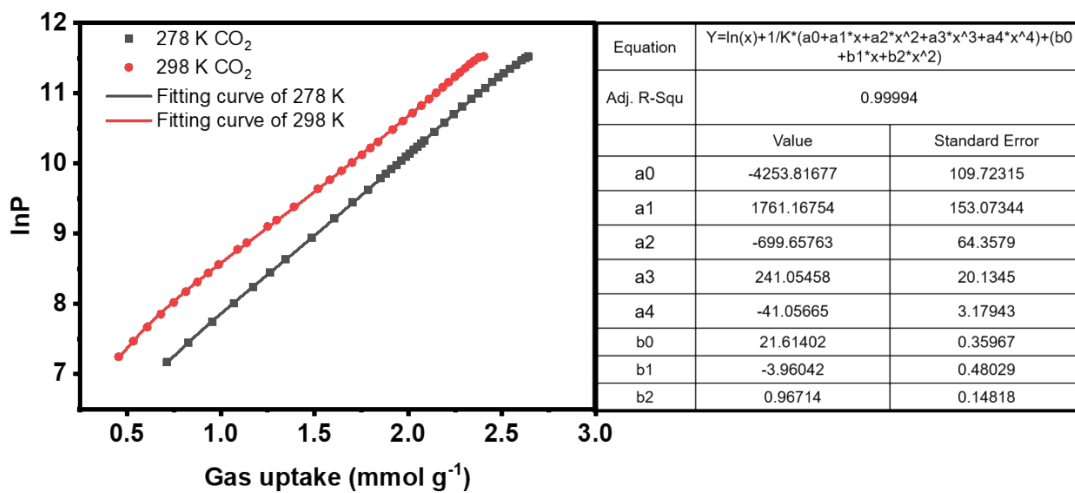

**Figure S8.** The details of virial equation (solid lines) fitting to the experimental CO<sub>2</sub> adsorption data (symbols) for Bi-BTC.

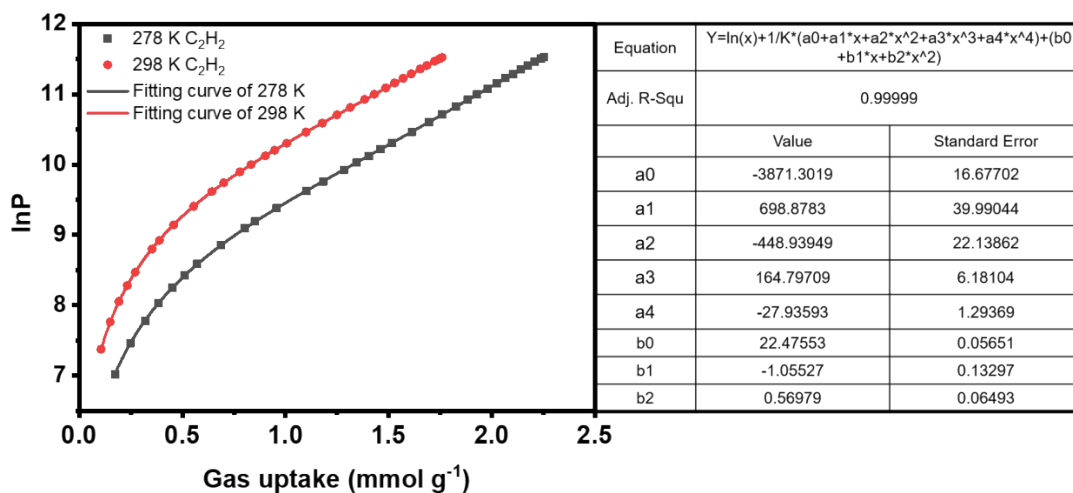

**Figure S9.** The details of virial equation (solid lines) fitting to the experimental C<sub>2</sub>H<sub>2</sub> adsorption data (symbols) for Bi-BTC

**Table S1.** Summary and cooperation of C<sub>2</sub>H<sub>2</sub> and CO<sub>2</sub> adsorption capacities at 298 K and isosteric heat of adsorption.

| Adsorbent                                   | S <sub>BET</sub><br>(m <sup>2</sup> g <sup>-1</sup> ) | C <sub>2</sub> H <sub>2</sub> uptake<br>(cm <sup>3</sup> g <sup>-1</sup> ) | CO <sub>2</sub> uptake<br>(cm <sup>3</sup> g <sup>-1</sup> ) | Q <sub>st</sub> (C <sub>2</sub> H <sub>2</sub> )<br>(kJ mol <sup>-1</sup> ) | IAST<br>Selectivity | Temperature<br>(K) | Ref.      |
|---------------------------------------------|-------------------------------------------------------|----------------------------------------------------------------------------|--------------------------------------------------------------|-----------------------------------------------------------------------------|---------------------|--------------------|-----------|
| SIFSIX-DPA-Cu-i                             | 898.74                                                | 75.59                                                                      | 50.17                                                        | 46.53                                                                       | 9.3                 | 298                | 1         |
| Zn-MUC-TRZ                                  | 696.3                                                 | 46.4                                                                       | 42.2                                                         | 33.06                                                                       | 1.47                | 298                | 2         |
| Zn(adenine)(TCPE)                           | 180.1                                                 | 48.1                                                                       | 33.8                                                         | 35.1                                                                        | 4.1                 | 298                | 3         |
| [Co <sub>2</sub> (F-PyIP) <sub>2</sub> DMF] | 509.1                                                 | 61.7                                                                       | 34.3                                                         | 34                                                                          | 6.3                 | 298                | 4         |
| JXNU-18                                     | 622                                                   | 55.2                                                                       | 31.5                                                         | 37.4                                                                        | 2.81                | 298                | 5         |
| ZNU-11                                      | 148.8                                                 | 45.5                                                                       | 22.5                                                         | 36.1                                                                        | 8.2                 | 298                | 6         |
| Bi-BTC                                      | 91.35                                                 | 53.8                                                                       | 39.4                                                         | 35.37                                                                       | 5.14                | 298                | This work |
| ZNU-9                                       | 1623                                                  | 177.9                                                                      | 100.8                                                        | 33.1                                                                        | 10.3                | 298                | 7         |
| ZNU-8                                       | 1402                                                  | 113.1                                                                      | 58.2                                                         | 27.2                                                                        | 3.7                 | 298                | 7         |
| Cu <sub>3</sub> (fbptc) <sub>2</sub>        | 432.1                                                 | 119.3                                                                      | 56.5                                                         | 27.2                                                                        | 3.6                 | 298                | 8         |
| NBU-7-Cl                                    | 123.7                                                 | 34.3                                                                       | 25.0                                                         | 33                                                                          | 3.3                 | 298                | 9         |
| FJU-83                                      | 872                                                   | 123                                                                        | 106                                                          | 26.9                                                                        | 2.93                | 298                | 10        |
| SNNU-29-Mn                                  | 1077                                                  | 115                                                                        | 50                                                           |                                                                             | 2.9                 | 298                | 11        |
| CoV-bdc-tpy                                 |                                                       | 164                                                                        | 87.2                                                         |                                                                             | 2.8                 | 298                | 12        |
| Cu-AD-GA                                    | 517                                                   | 74                                                                         | 58                                                           |                                                                             | 2.2                 | 298                | 13        |



## References

1. J. You, H. Wang, T. Xiao, X. Wu, L. Zhang and C. Z. Lu, *Chem. Eng. J.*, 2023, **477**, 147001.
2. L. Q. Yang, J. Yu, P. Zhang, Y. Wang, W. Y. Yuan and Q. G. Zhai, *Sep. Purif. Technol.*, 2023, **327**, 124930.
3. W. Yuan, W. Wang, P. Cen, H. Zhou, X. Liu and B. Liu, *Inorg. Chem.*, 2023, **62**, 15110-15117.
4. X. Y. Zhang, W. J. Shi, G. D. Wang, L. Hou and Y. Y. Wang, *Inorg. Chem.*, 2023, **62**, 16574-16581.
5. X. P. Fu, X. Y. Le, Y. H. Xiao, D. M. Zeng, K. A. Zhou, L. Huang, Y. L. Wang and Q. Y. Liu, *Inorg. Chem.*, 2023, **62**, 15031-15038.
6. Y. Han, Y. Jiang, J. Hu, L. Wang and Y. Zhang, *Sep. Purif. Technol.*, 2024, **332**, 125777.
7. Y. Zhang, W. Sun, B. Luan, J. Li, D. Luo, Y. Jiang, L. Wang and B. Chen, *Angew. Chem. Int. Ed.*, 2023, **62**, e202309925.
8. R. H. Su, W. J. Shi, X. Y. Zhang, L. Hou and Y. Y. Wang, *Inorg. Chem.*, 2023, **62**, 11869-11875.
9. J. Wu, Y. Wang, J.-P. Xue, D. Wu and J. Li, *Inorg. Chem.*, 2023, **62**, 19997-20004.
10. X. B. Xu, Y. Yang, Z. Yuan, F. Zheng, F. Xiang, Z. Bao, Z. Zhang and S. Xiang, *Sep. Purif. Technol.*, 2023, **325**, 124654.
11. Y. Y. Xue, X. Y. Bai, J. Zhang, Y. Wang, S. N. Li, Y. C. Jiang, M. C. Hu and Q. G. Zhai, *Angew. Chem. Int. Ed.*, 2021, **60**, 10122-10128.
12. W. Wang, H. Yang, Y. Chen, X. Bu and P. Feng, *J. Am. Chem. Soc.*, 2023, **145**, 17551-17556.
13. L. Wang, J. Lv, Q. Ye, Y. Luo, G. Y. Wang and L. H. Xie, *ACS Appl. Nano Mater.*, 2023, **6**, 22095-22103.
